# Supplementary material for: Organic Phosphorus Substantially Contributes to Crop Plant Nutrition in Soils with Low Phosphorus Availability
Source: MDPI journal article supplement (doi:10.3390/agronomy11050903), 2021-05-04
Supplement: s1 [file s1]

Archive with 2 entries (2 files):
- Figure S1- resubmitted II.pdf
- Table S1- resubmitted II.xlsx
