# Supplementary material for: Organic Phosphorus Substantially Contributes to Crop Plant Nutrition in Soils with Low Phosphorus Availability
Source: MDPI journal article supplement (doi:10.3390/agronomy11050903), 2021-05-04
Supplement: s1 [file s1 › Figure S1- resubmitted II.pdf]

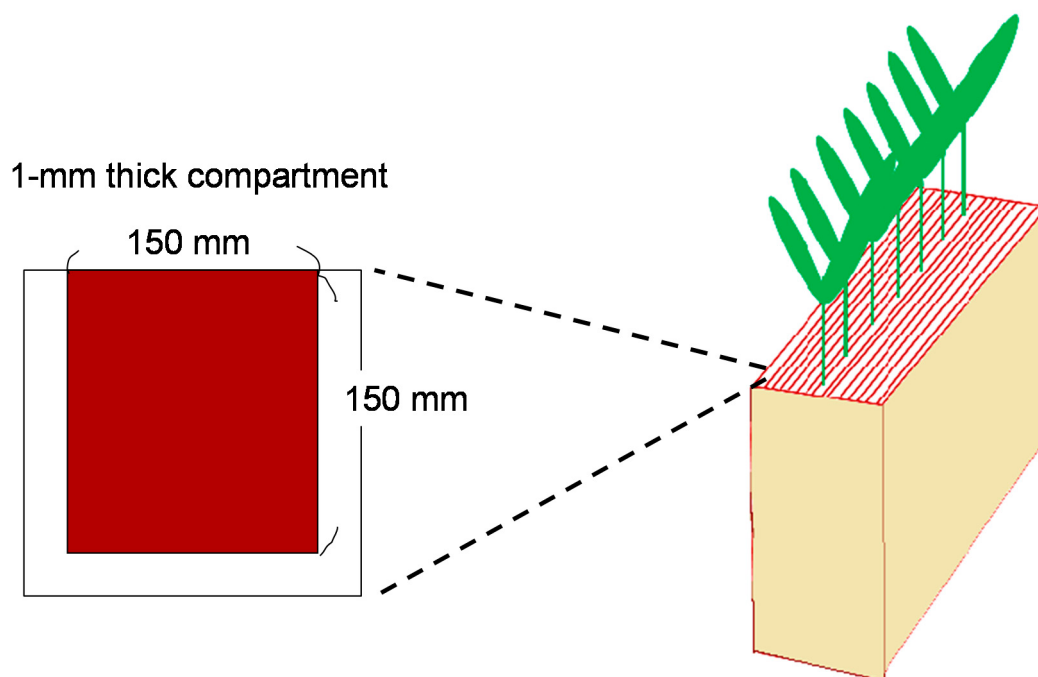

**Figure S1.** A diagram of rhizobox. Each compartment was separated by a 25- $\mu$ m nylon mesh. The root compartment was situated in the center of the rhizobox, accommodating seven compartments on each side.
