# Supplementary material for: Organic Phosphorus Substantially Contributes to Crop Plant Nutrition in Soils with Low Phosphorus Availability
Source: MDPI journal article supplement (doi:10.3390/agronomy11050903), 2021-05-04
Supplement: s1 [file s1 › Table S1- resubmitted II.xlsx]

## Sheet: Sheet1
Fig. 1a. pH
		L7	L6	L5	L4	L3	L2	L1	Center	R1	R2	R3	R4	R5	R6	R7
	NPK	6.03	6.02333	6.02667	6.05667	6.04	6.06667	6.09667	5.93	6.09667	6.00667	5.97	5.99	5.99333	5.91333	5.98
	NPKC	5.80667	5.82333	5.83667	5.86333	5.86	5.80333	5.71667	5.54333	5.72	5.86667	5.87667	5.86	5.88333	5.87	5.88
Fig. 1b. Enzyme activity
	Phosphomonoesterase
		L7	L6	L5	L4	L3	L2	L1	Center	R1	R2	R3	R4	R5	R6	R7
	NPK	3.10946	3.40572	3.50413	3.05845	3.18108	3.03527	4.05698	5.11425	3.84496	3.32947	2.6916	3.2053	3.76124	3.49254	3.13187
	NPK+Compost	4.80777	5.02997	4.73658	5.06023	4.91815	4.60603	5.75076	5.49052	5.32884	3.98467	4.23627	4.40976	4.11436	4.5115	4.44867
	Phosphodiesterase
	NPK	0.351084	0.376882	0.363835	0.393487	0.363538	0.371544	1.15822	1.66973	1.14132	0.390225	0.342781	0.364428	0.348712	0.393487	0.351381
	NPK+Compost	0.435284	0.451276	0.436738	0.387016	0.416675	0.456801	1.13779	1.13081	0.923488	0.376548	0.37335	0.400682	0.38469	0.405044	0.416965
Fig. 2a. P concentration in NaHCO3 fraction of NPK soil
		L7	L6	L5	L4	L3	L2	L1	Center	R1	R2	R3	R4	R5	R6	R7
	Pt	123.708	133.909	112.902	139.752	128.429	123.822	149.926	115.079	134.167	123.497	124.227	104.259	121.754	126.255	110.806
	Pi	100.711	102.93	103.654	105.708	114.62	113.346	106.972	105.349	107.609	110.939	112.513	93.9305	103.645	96.7378	96.9492
	PP	9.16771	8.62338	7.64434	14.3106	6.96181	5.77876	7.91554	4.33122	9.67837	4.8117	3.19281	8.57493	4.05587	13.3479	7.78744
	PP+GP	29.8733	17.7513	29.2578	40.3603	24.7986	24.7076	26.2957	3.06248	21.375	19.9663	15.4244	19.2061	27.8895	17.5679	10.0624
	PP+GP+NP	41.8584	28.6682	23.7976	42.7081	16.9267	22.205	33.2721	6.56245	27.5673	28.5105	15.7842	21.1311	31.0824	22.2006	22.7498
Fig. 2b. P concentration in NaOH fraction of NPK soil
		L7	L6	L5	L4	L3	L2	L1	Center	R1	R2	R3	R4	R5	R6	R7
	Pt	1767.22	1952.18	1884.76	1988.06	1836.1	2129.81	1857.79	2075.58	2075.41	1786.83	2120.43	1841.08	1878.53	1914.29	1849.58
	Pi	1014.35	986.055	1126.52	1091.98	934.7	998.718	973.158	1050.62	1028.15	908.985	956.508	1247.84	1079.02	984.426	1129.66
	PP	0	52.8554	33.7674	0	172.589	101.396	113.496	19.7718	209.311	133.902	287.351	0	2.63006	167.355	0
	PP+GP	2.67554	117.576	81.6045	46.5271	200.963	175.028	145.856	0	104.16	183.92	287.351	0	4.89099	220.371	0
	PP+GP+NP	35.5529	164.217	88.9208	43.7156	147.545	140.182	140.51	22.674	111.192	100.911	216.158	39.408	45.7723	152.59	112.749
Fig. 2c. P concentration in NaHCO3 fraction of NPK+compost soil
		L7	L6	L5	L4	L3	L2	L1	Center	R1	R2	R3	R4	R5	R6	R7
	Pt	198.863	194.626	254.912	147.386	151.633	178.745	140.15	127.34	145.559	151.996	141.009	241.838	171.225	181.17	229.628
	Pi	169.805	190.698	183.21	134.462	134.32	135.239	124.764	109.478	133.63	141.145	134.911	171.208	163.666	187.587	168.729
	PP	2.99595	0	7.09365	6.2458	8.67569	9.03292	10.1558	12.4947	1.99684	2.78506	8.00705	8.82565	0.604306	2.97117	8.42899
	PP+GP	35.8499	18.7597	11.5846	35.7991	24.5471	25.0064	42.4511	31.5839	26.3267	7.46186	27.4959	17.3042	25.2298	8.76243	22.8574
	PP+GP+NP	45.0916	9.30105	34.8559	42.5019	41.8985	28.7829	49.0524	40.1121	10.6673	11.981	20.9996	34.7572	34.6972	16.6184	34.0134
Fig. 2d. P concentration in NaOH fraction of NPK+compost soil
		L7	L6	L5	L4	L3	L2	L1	Center	R1	R2	R3	R4	R5	R6	R7
	Pt	2062.26	2067.84	2046.82	2199.36	2171.96	2141.77	2043.02	2144.77	2049.46	2042.75	2111.64	1796.91	2062.32	2123.28	1981.91
	Pi	1049.6	1086.03	1092.96	961.625	1094.47	995.09	1013.96	1045.03	913.661	959.258	985.837	905.966	1075.43	1029.37	1044.74
	PP	82.4141	102.273	35.2614	141.952	83.029	171.09	93.8479	175.339	57.7774	95.2431	99.3883	175.725	24.4842	207.993	146.288
	PP+GP	140.759	95.3987	0	163.99	47.9555	101.044	33.111	193.061	146.595	123.918	149.034	204.446	78.8225	155.182	171.559
	PP+GP+NP	132.888	55.2412	21.1173	51.6421	47.251	87.5075	36.6837	163.102	149.278	89.5373	112.946	157.3	45.4707	95.72	114.093
Fig. 3a. AWCD in Eco plate.
		L7	L6	L5	L4	L3	L2	L1	Center	R1	R2	R3	R4	R5	R6	R7
	NPK	0.20143	0.247613	0.193075	0.194086	0.140161	0.144054	0.148323	0.538473	0.259505	0.144677	0.186699	0.13657	0.215796	0.166667	0.169172
	NPK+compost	0.377011	0.494086	0.347161	0.376118	0.397505	0.486301	0.380796	0.529097	0.479667	0.435849	0.459763	0.455849	0.503301	0.455849	0.326634
Fig. 3b. AWCD in SFN2 plate.
		L7	L6	L5	L4	L3	L2	L1	Center	R1	R2	R3	R4	R5	R6	R7
	NPK	0.538126	0.612253	0.598084	0.612979	0.542	0.546621	0.5932	0.677653	0.5926	0.536295	0.475737	0.593758	0.584568	0.569053	-
	NPKC	0.496768	0.508863	0.424379	0.484147	0.449189	0.4676	0.455547	0.489821	0.547105	0.480211	0.487063	0.422095	0.490653	0.495674	0.406074
Fig. 3c. Relative utilization of Po.
		L7	L6	L5	L4	L3	L2	L1	Center	R1	R2	R3	R4	R5	R6	R7
	NPK	0.144934	0	0.0612587	0	0.0654387	0	0.99163	1.02419	0	0.0330131	0	0	0	0.100878	0.174791
	NPK+compost	0	0.0204746	0.542088	0.049724	0.0580008	0.0940692	0.226546	0.587479	0	0.271208	0	0	0.0306076	0.512371	0.012255
